# Supplementary material for: Development and Validation of Nomograms to Predict Prognosis of Oral and Oropharyngeal Mucoepidermoid Carcinoma: A SEER-Based Study
Source: Research Square preprint supplement (doi:10.21203/rs.3.rs-125136/v1), 2020-12-15
Supplement: Supplementary file 2 [file 19e9d9b79df08ac3a6713141.docx]

**Table 1. Clinicopathological Parameters of Training Set and Validation Set in Oral and Oropharyngeal Mucoepidermoid Carcinoma.**

| **Patient characteristics** | **Training Set**  **(n=862)** | **Validation Set**  **(n=368)** | ***p*** |
| --- | --- | --- | --- |
| **Age (years), median** | 53 | 54 | 0.274 |
| **Sex, n (%)** |  |  | 0.300 |
| Male | 359 (41.6) | 165 (44.8) |  |
| Female | 503 (58.4) | 203 (55.2) |  |
| **Race, n (%)** |  |  | 0.193 |
| White | 643 (74.6) | 292 (79.3) |  |
| Black | 117 (13.6) | 39 (10.6) |  |
| Other | 102 (11.8) | 37 (10.1) |  |
| **Grade, n (%)** |  |  | 0.183 |
| I | 229 (26.6) | 104 (28.3) |  |
| II | 455 (52.8) | 203 (55.1) |  |
| III-IV | 106 (12.3) | 43 (11.7) |  |
| Unknown | 72 (8.3) | 18 (4.9) |  |
| **T stage, n (%)** |  |  | 0.145 |
| T1 | 617 (71.6) | 257 (69.8) |  |
| T2 | 152 (17.6) | 55 (15.0) |  |
| T3 | 21 (2.4) | 13 (3.5) |  |
| T4 | 72 (8.4) | 43 (11.7) |  |
| **N stage, n (%)** |  |  | 0.297 |
| N0 | 758 (87.9) | 323 (87.8) |  |
| N1 | 56 (6.5) | 18 (4.9) |  |
| N2-3 | 48 (5.6) | 27 (7.3) |  |
| **M stage, n (%)** |  |  | 0.617 |
| M0 | 849 (98.5) | 361 (98.1) |  |
| M1 | 13 (1.5) | 7 (1.9) |  |
| **Tumor subsite, n (%)** |  |  | 0.537 |
| AT | 24 (2.8) | 20 (5.4) |  |
| BM | 99 (11.5) | 33 (9.0) |  |
| FM | 52 (6.0) | 19 (5.2) |  |
| HP | 224 (26.0) | 100 (27.2) |  |
| G | 110 (12.8) | 48 (13.0) |  |
| L | 44 (5.1) | 16 (4.3) |  |
| OL | 96 (11.1) | 41 (11.2) |  |
| SP | 94 (10.9) | 35 (9.5) |  |
| TO | 13 (1.5) | 4 (1.1) |  |
| BT | 90 (10.4) | 45 (12.2) |  |
| OO | 16 (1.9) | 7 (1.9) |  |
| **Surgery, n (%)** |  |  | 0.302 |
| Yes | 791(91.8) | 344(93.5) |  |
| No | 71(8.2) | 24(6.5) |  |

**Abbreviations：AT** : anterior of tongue; **BM** : buccal mucuso; **FM** : floor of mouth; **HP** : hard plate; **G** : gum; **L** : lip; **OL** : Overlapping Lesion of oral cavity and oropharynx; **SP** : Soft plate; **TO** : tonsil; **BT** : Base of tongue; **OO** : Overlapping lesion of oropharynx.
